# Supplementary material
Source: PubMed Central journal article supplement (PMC2651627)
Supplement: ct8003707_si_001.pdf [file ct8003707_si_001.pdf]

Supplementary material

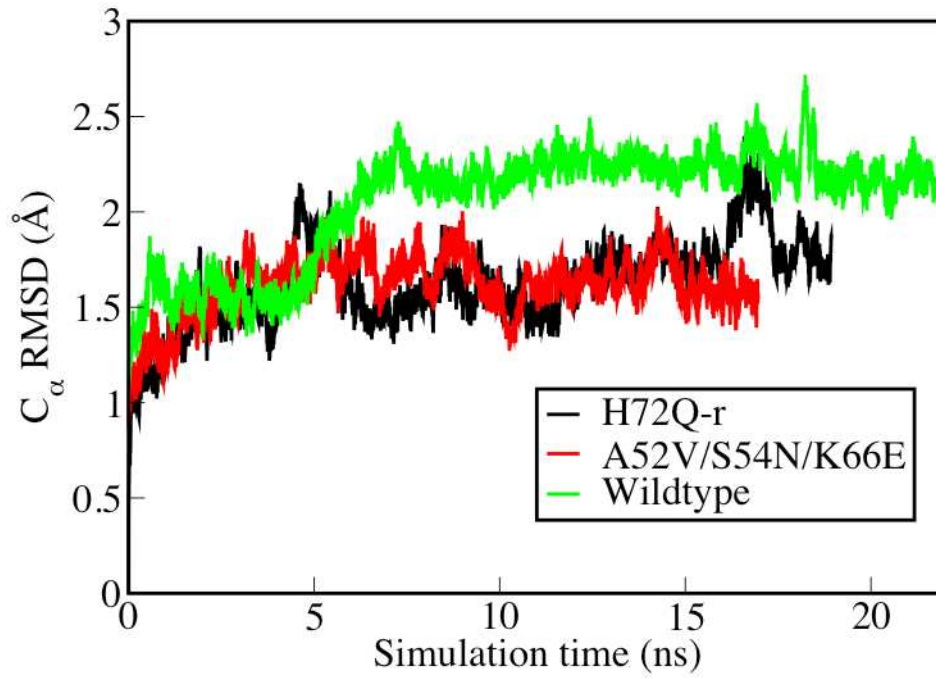

**Figure S1.**  $C_{\alpha}$  RMSD trajectories for the three MD simulations reported.
